# Supplementary material for: Designing and implementing an all Wales postpartum haemorrhage quality improvement project: OBS Cymru (the Obstetric Bleeding Strategy for Wales)
Source: PubMed Central journal article supplement — BMJ Open Qual. 2020 Apr 8;9(2):e000854. doi: 10.1136/bmjoq-2019-000854 (PMC7326295; doi:10.1136/bmjoq-2019-000854), 2020-04-08

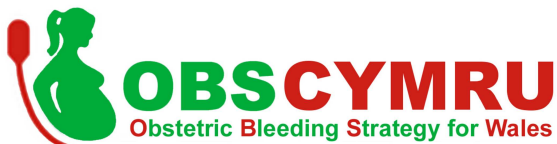

**Project Driver Diagram - Feb 2018 V1.3**

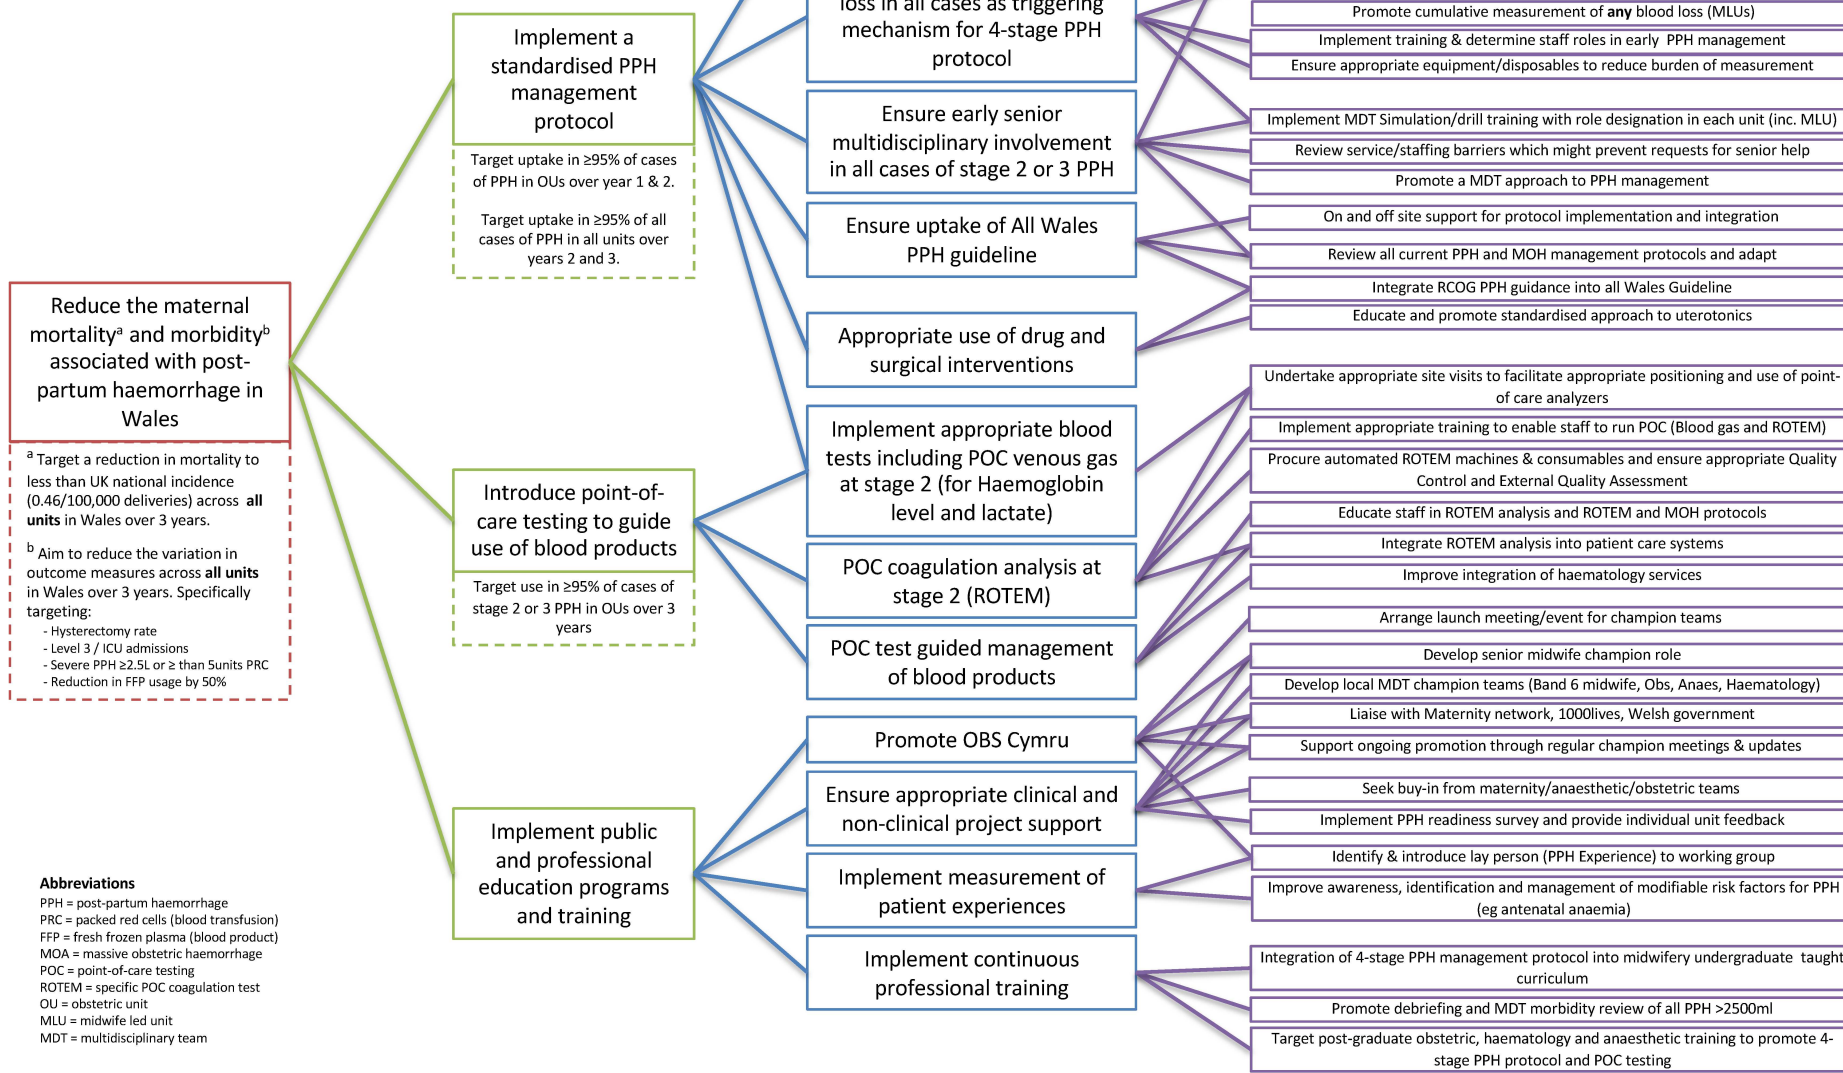

**Reduce the maternal mortality<sup>a</sup> and morbidity<sup>b</sup> associated with post-partum haemorrhage in Wales**

<sup>a</sup> Target a reduction in mortality to less than UK national incidence (0.46/100,000 deliveries) across **all units** in Wales over 3 years.

<sup>b</sup> Aim to reduce the variation in outcome measures across **all units** in Wales over 3 years. Specifically targeting:

- Hysterectomy rate
- Level 3 / ICU admissions
- Severe PPH ≥2.5L or ≥ than 5units PRC
- Reduction in FFP usage by 50%

**Implement a standardised PPH management protocol**

Target uptake in ≥95% of cases of PPH in OUs over year 1 & 2.

Target uptake in ≥95% of all cases of PPH in all units over years 2 and 3.

**Introduce point-of-care testing to guide use of blood products**

Target use in ≥95% of cases of stage 2 or 3 PPH in OUs over 3 years

**Implement public and professional education programs and training**

**Abbreviations**

PPH = post-partum haemorrhage  
 PRC = packed red cells (blood transfusion)  
 FFP = fresh frozen plasma (blood product)  
 MOA = massive obstetric haemorrhage  
 POC = point-of-care testing  
 ROTEM = specific POC coagulation test  
 OU = obstetric unit  
 MLU = midwife led unit  
 MDT = multidisciplinary team

Copyright © 2016, Public Health Wales

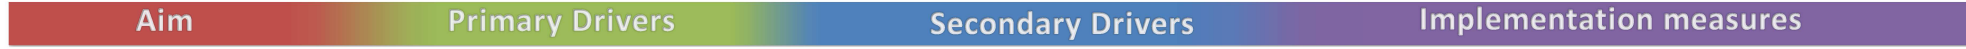

Supplement: bmjoq-2019-000854supp001.pdf [file bmjoq-2019-000854supp001.pdf]
