# Supplementary material for: Designing and implementing an all Wales postpartum haemorrhage quality improvement project: OBS Cymru (the Obstetric Bleeding Strategy for Wales)
Source: PubMed Central journal article supplement — BMJ Open Qual. 2020 Apr 8;9(2):e000854. doi: 10.1136/bmjoq-2019-000854 (PMC7326295; doi:10.1136/bmjoq-2019-000854), 2020-04-08
Supplement: bmjoq-2019-000854supp002.pdf [file bmjoq-2019-000854supp002.pdf]

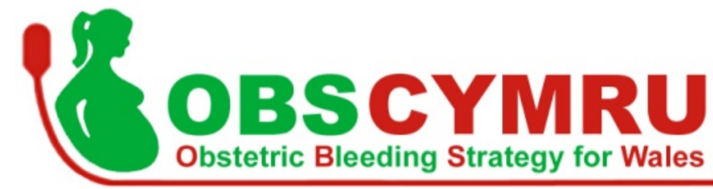

# ROTEM Protocol

(For use in postpartum haemorrhage)

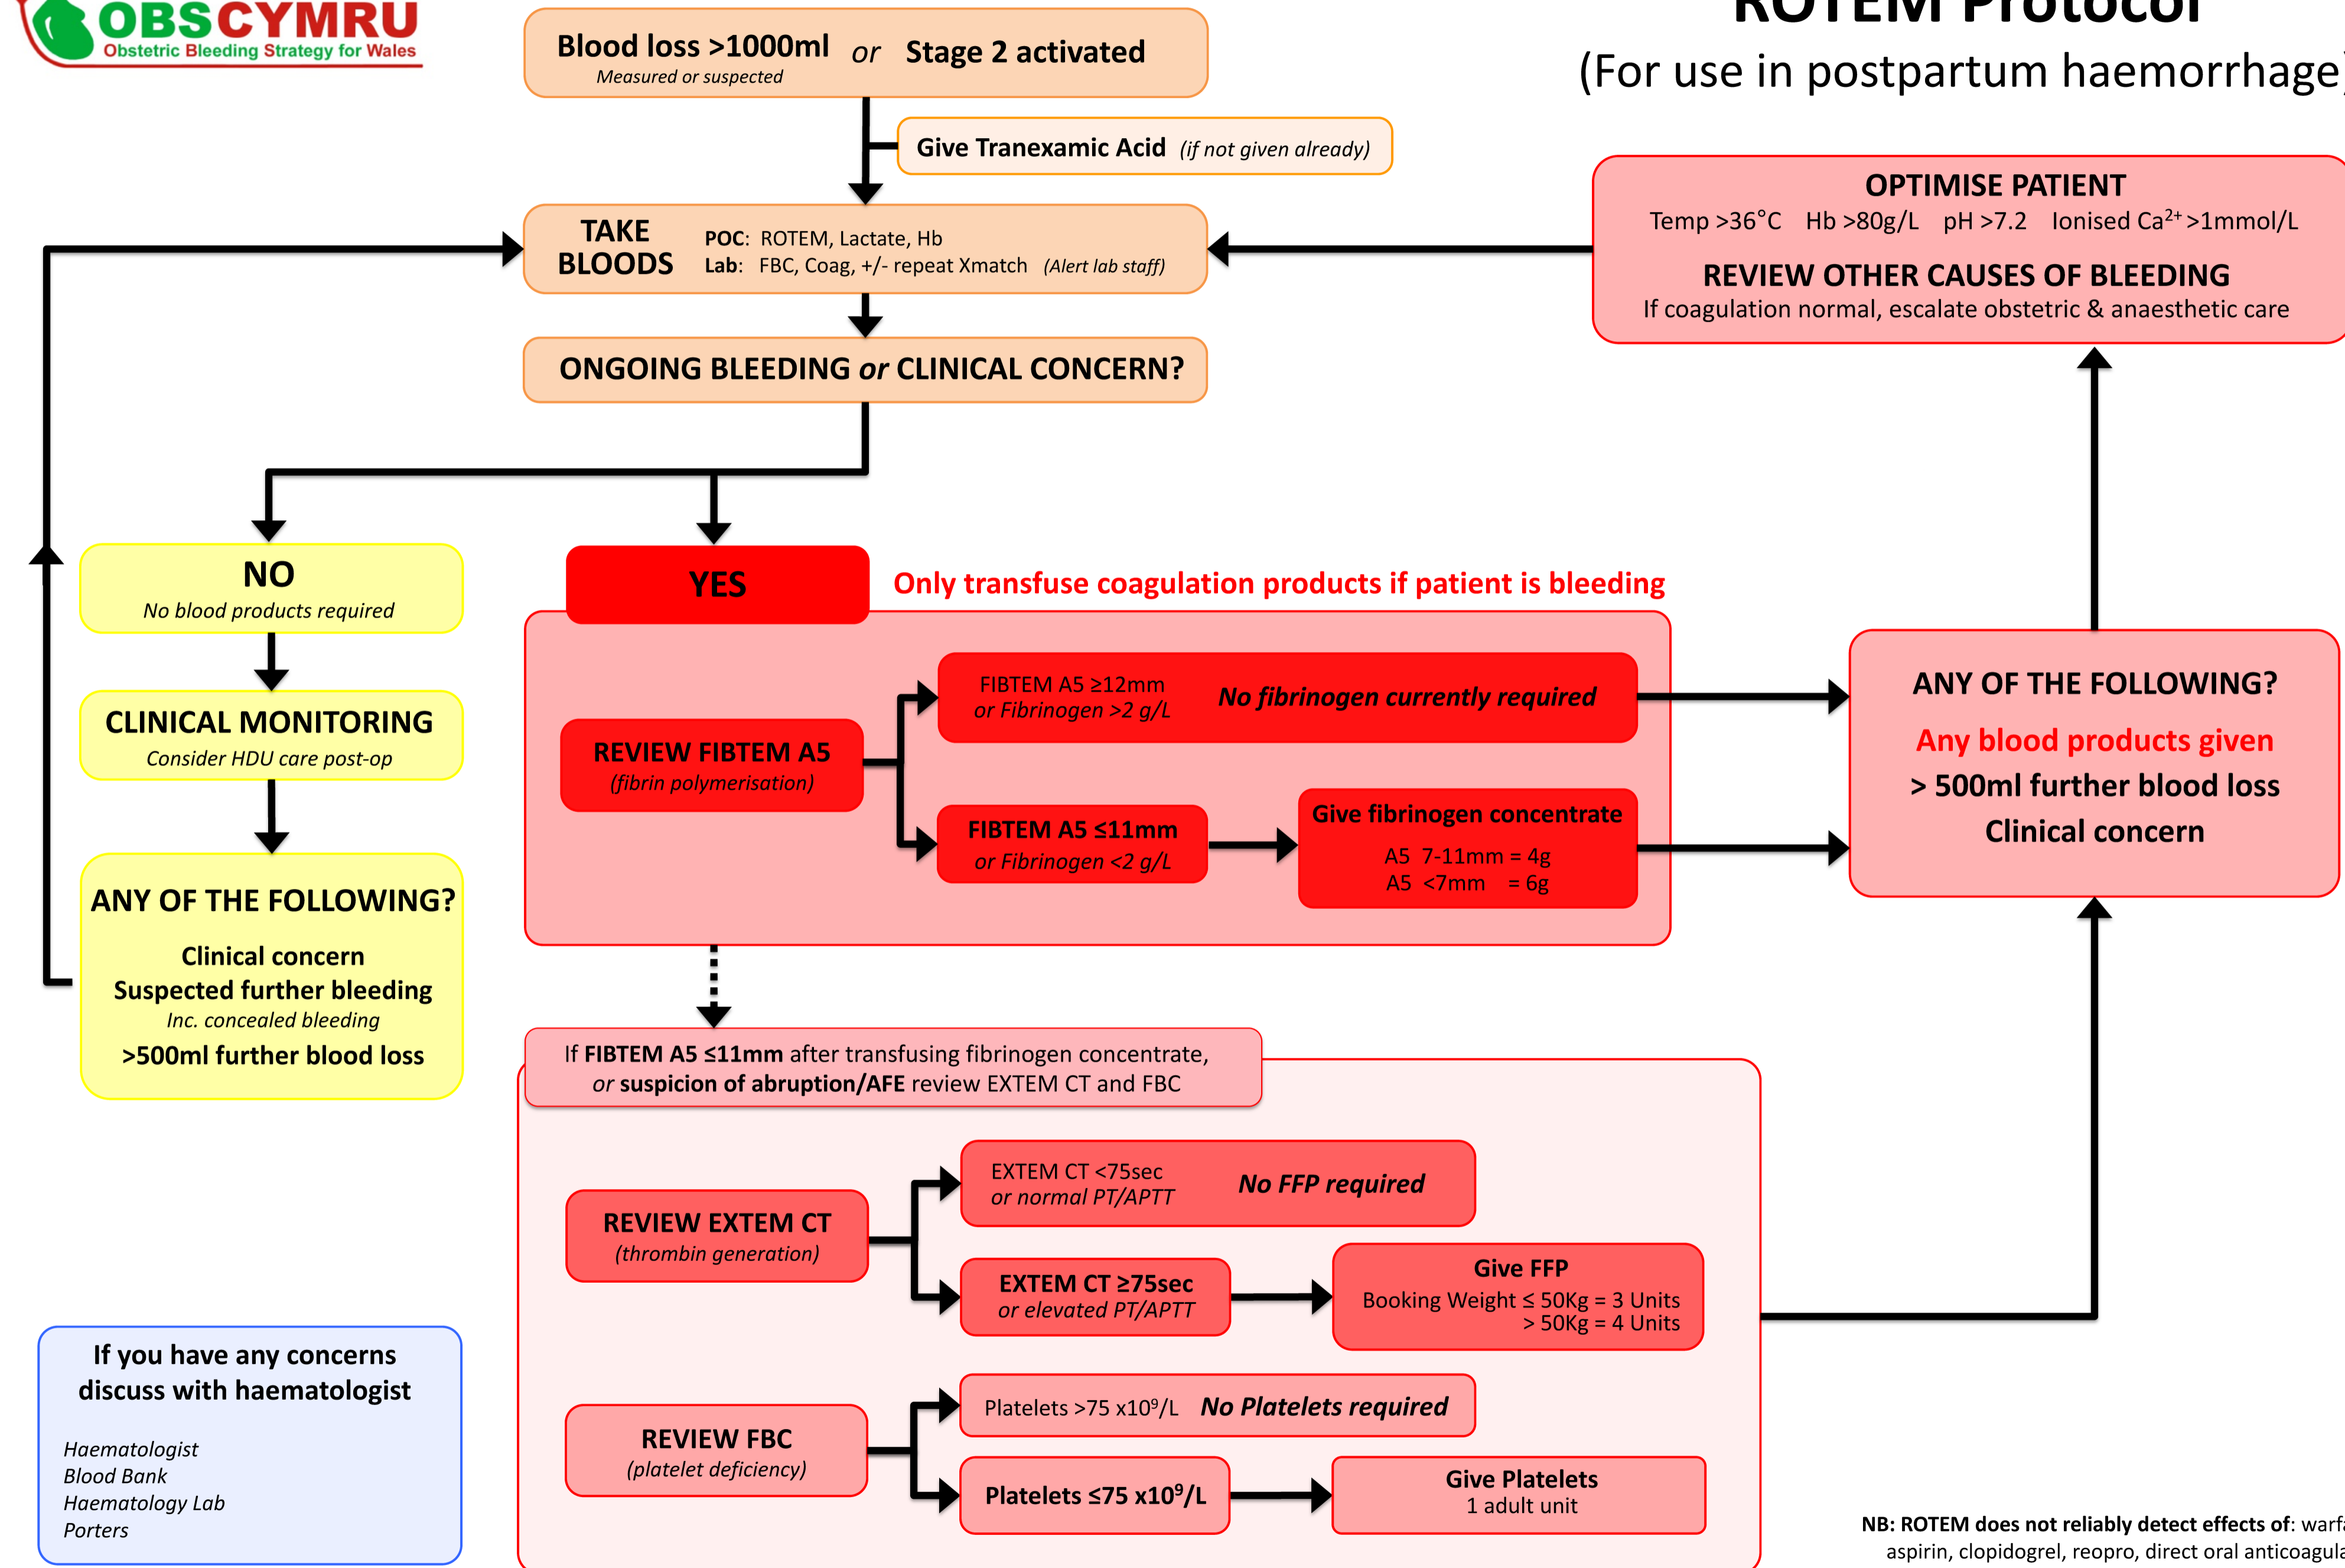

**NB: ROTEM does not reliably detect effects of:** warfarin, aspirin, clopidogrel, reopro, direct oral anticoagulants, LMWH. It will not detect deficiency of von Willebrand factor.
