# Supplementary material for: Designing and implementing an all Wales postpartum haemorrhage quality improvement project: OBS Cymru (the Obstetric Bleeding Strategy for Wales)
Source: PubMed Central journal article supplement — BMJ Open Qual. 2020 Apr 8;9(2):e000854. doi: 10.1136/bmjoq-2019-000854 (PMC7326295; doi:10.1136/bmjoq-2019-000854), 2020-04-08
Supplement: bmjoq-2019-000854supp003.pdf [file bmjoq-2019-000854supp003.pdf]

| Date/Time | Documentation of concerns, deviations & other information |
|-----------|-----------------------------------------------------------|
|           |                                                           |
|           |                                                           |
|           |                                                           |
|           |                                                           |
|           |                                                           |
|           |                                                           |
|           |                                                           |
|           |                                                           |
|           |                                                           |
|           |                                                           |
|           |                                                           |
|           |                                                           |
|           |                                                           |
|           |                                                           |

## PPH Post-event Checklist

**WHO** sign-out completed? Yes / No / NA (Patient did not require care in theatre)

Have all drugs been prescribed and signed for? Yes / No / NA

**Post-event Re-bleed Risk Assessment**

|                                          |                    |                               |
|------------------------------------------|--------------------|-------------------------------|
| Syntocinon infusion running or required? | Yes / No           | Time expected to finish _____ |
| Vaginal pack insitu?                     | Yes / No           | Planned removal time _____    |
| Bakri Balloon insitu?                    | Yes / No           | Planned removal time _____    |
| Can NSAID be given?                      | Yes / No / Not yet |                               |

**Thromboprophylaxis** plan:

|  |      |          |                           |
|--|------|----------|---------------------------|
|  | LMWH | Yes / No | Time of first dose: _____ |
|  | TEDS | Yes / No |                           |

**Post-event Monitoring Requirements**

|                                                       |             |                                 |               |
|-------------------------------------------------------|-------------|---------------------------------|---------------|
| Level of post-event care required (circle applicable) | Level 1     | Level 2 (HDU)                   | Level 3 (ICU) |
| Post-op bloods (FBC/Coag/U&E) to be taken at          | Time: _____ | Plan to transfuse if Hb < _____ |               |
| PV loss monitoring required?                          | Yes / No    | Frequency of monitoring _____   |               |
| Urine output monitoring required?                     | Yes / No    | Frequency of monitoring _____   |               |

**MOH** stand down Yes / No / NA

Any blood/products to return to blood bank? Yes / No / NA

If the MOH protocol was activated before stage 3 or not activated at stage 3 then please detail reason(s) why:

---

**Does a Datix form need completing?** Yes / No

*If yes record:*

- Datix form number \_\_\_\_\_
- Person responsible for completing Datix form \_\_\_\_\_

Does the case need **highlighting to OBS Cymru Champion?** Yes / No (triggers include MBL ≥1000ml, ROTEM performed, blood products given)

Has the event been discussed with the patient? Yes / No

Has **written information** been provided to the patient? Yes / No

Does a **formal team debrief** need to take place? Yes / No

Completed by: \_\_\_\_\_ (Please print)      Date: \_\_\_\_\_      Time: \_\_\_\_:\_\_\_\_      Location \_\_\_\_\_

Working together to reduce harm from Postpartum Haemorrhage

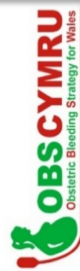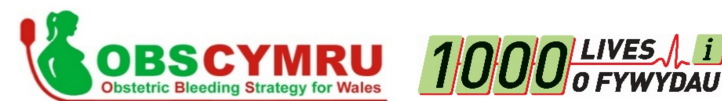

### Postpartum Haemorrhage Management Checklist

Designed to be used in maternity settings. This is not a comprehensive guideline but a checklist to facilitate an appropriately escalating multidisciplinary team approach to postpartum haemorrhage and as an aid to documentation.

Patient addressograph

### Stage 0

#### PPH Risk Assessment

*Complete for all women on admission (including LSCS)*

Most recent Hb = \_\_\_\_\_ Plt = \_\_\_\_\_ Result Date: \_\_\_\_/\_\_\_\_/\_\_\_\_

**PPH Risk Assessment** Tick if applicable

| Antenatal - "Increased risk" if any of the following are met:                                                               |  |
|-----------------------------------------------------------------------------------------------------------------------------|--|
| Anaemia or bleeding disorder (Hb <95, plt < 100)                                                                            |  |
| BMI <18 or >35 or Booking Weight <55kg<br><i>If low weight/BMI - do you need to calculate the circulating blood volume?</i> |  |
| ≥ 5 previous vaginal births                                                                                                 |  |
| Previous uterine surgery                                                                                                    |  |
| Previous Postpartum Haemorrhage >1L                                                                                         |  |
| Multiple pregnancy or estimated fetal weight >4.5kg                                                                         |  |
| Abnormal placental implantation                                                                                             |  |
| Polyhydramnios                                                                                                              |  |
| Known Abruptio or Antepartum Haemorrhage                                                                                    |  |

*Please make an on-going assessment of the following risk factors throughout labour and delivery*

| Perinatal - "Increased risk" if any of the following are met: |  |
|---------------------------------------------------------------|--|
| Suspicion of chorioamnionitis / Sepsis                        |  |
| Labour augmented with syntocinon                              |  |
| Prolonged labour                                              |  |
| Instrumental delivery                                         |  |
| Retained products of conception                               |  |

**Plan to measure & record all blood loss**  
*(for pool deliveries estimation may be required)*

**Act**

**If woman at increased risk is:**

|                                              |          |
|----------------------------------------------|----------|
| She suitable for EI blood or 2 units Xmatch? | Yes / No |
| IV access required? (at least 16 Gauge)      | Yes / No |

**Treat**

|                                         |          |
|-----------------------------------------|----------|
| Planned an active 3rd stage management? | Yes / No |
|-----------------------------------------|----------|

Completed by: \_\_\_\_\_ (Please print)  
Date: \_\_\_\_\_ Time: \_\_\_\_:\_\_\_\_ Location \_\_\_\_\_

### Stage 1

#### >500ml ongoing blood loss

*SVD & Instrumental deliveries*

|                                                              |              |              |
|--------------------------------------------------------------|--------------|--------------|
| <b>Get Help</b>                                              | Time         | Initial      |
| Notify midwife in charge                                     |              |              |
| Name: _____ time arrived: ____:____                          |              |              |
| Request HCA to assist with measurement                       |              |              |
| <b>Other staff present</b>                                   | Designation  | Time Arrived |
|                                                              |              |              |
|                                                              |              |              |
| <b>Act</b>                                                   | Performed by | Time Initial |
| <b>Measure Blood Loss</b><br><i>(cumulative measurement)</i> |              |              |
| Record observations on MEOWS every 10 min                    |              |              |
| IV access at least 16 Gauge                                  |              |              |

**What is the cause of bleeding?**

Tone, Trauma, Tissue, Thrombin (please circle cause(s))

|                                                                  |              |      |         |
|------------------------------------------------------------------|--------------|------|---------|
|                                                                  | Performed by | Time | Initial |
| Uterine massage                                                  |              |      |         |
| Give uterotonics<br><i>(record on over page &amp; prescribe)</i> |              |      |         |
| Inspect genital tract                                            |              |      |         |
| Empty bladder                                                    |              |      |         |
| Check placenta & membranes                                       |              |      |         |
| Bimanual compression                                             |              |      |         |

**If bleeding stopped:**

- Please record MBL here \_\_\_\_\_ ml

Completed by: \_\_\_\_\_ (Please print)  
Date: \_\_\_\_\_ Time: \_\_\_\_:\_\_\_\_ Location \_\_\_\_\_

**Stage 2 >1000mL blood loss OR clinical concern (eg. Abruption or concealed bleeding) OR abnormal vital signs RR > 30, HR ≥120, BP ≤90/40mmHg, SpO2<95%**

Progress to here from stage 1 if SVD / instrumental delivery. Re-start here after stage 0 if LSCS

**Get Help**

|              |             |                     |              |                    |                    |                     |
|--------------|-------------|---------------------|--------------|--------------------|--------------------|---------------------|
| MW in charge | Name: _____ | Time arrived: _____ | Other staff: | Name: _____        | Designation: _____ | Time arrived: _____ |
| Obstetrician | Name: _____ | Time: _____         | Name: _____  | Designation: _____ | Time: _____        |                     |
| Anaesthetist | Name: _____ | Time: _____         | Name: _____  | Designation: _____ | Time: _____        |                     |
| HCA          | Name: _____ | Time: _____         |              |                    |                    |                     |

**Act**

|                                                                                                                |                     |             |                |
|----------------------------------------------------------------------------------------------------------------|---------------------|-------------|----------------|
| Measure & record cumulative blood loss                                                                         | <b>Performed by</b> | <b>Time</b> | <b>Initial</b> |
| Record observations on MEOWS every 10 min                                                                      |                     |             |                |
| 2 <sup>nd</sup> IV access (at least 16 Gauge) & fluid bolus                                                    |                     |             |                |
| <b>Take bloods</b> Point of care tests - ROTEM, venous lactate, venous Hb<br>Lab test - FBC, Coag, XMatch, U&E |                     |             |                |

| Initial VBG Test Results |      |           | Initial ROTEM Test Results                 |                                                |
|--------------------------|------|-----------|--------------------------------------------|------------------------------------------------|
| Time:                    | Hb = | Lactate = | FIBTEM A5 =<br><small>(Aim ≥ 12mm)</small> | EXTEM CT =<br><small>(Aim &lt; 75 sec)</small> |

**Review causes** (circle all identified) Tone / Trauma / Tissue / Thrombin

**Treat**

| Performed by | Time | Initial |                            |
|--------------|------|---------|----------------------------|
|              |      |         | Empty bladder              |
|              |      |         | Foley catheter inserted    |
|              |      |         | Inspect genital tract      |
|              |      |         | Repair genital tract       |
|              |      |         | Check placenta & membranes |

**If bleeding stopped ensure** PPH post-event checklist completed & Management plan written in notes

Completed by: \_\_\_\_\_ (Please print) Date: \_\_\_\_\_ Time: \_\_\_\_:\_\_\_\_ Location \_\_\_\_\_

**If bleeding ongoing transfer patient to theatre** time arrived: \_\_\_\_:\_\_\_\_

**Stage 3 >1500mL blood loss OR ongoing clinical concern**

**Act**

|                                                                                                                               |                     |             |                |
|-------------------------------------------------------------------------------------------------------------------------------|---------------------|-------------|----------------|
| Communicate current measured blood loss to team                                                                               | <b>Performed by</b> | <b>Time</b> | <b>Initial</b> |
| Activate MOH protocol                                                                                                         |                     |             |                |
| Inform Obstetric and Anaesthetic consultants                                                                                  |                     |             |                |
| Order blood and coagulation products as per MOH and ROTEM protocol<br>- Do you need to discuss the case with a haematologist? |                     |             |                |

**Review causes** (circle all identified) Tone / Trauma / Tissue / Thrombin

**Treat**

| Performed by | Time | Initial |                                                                         |
|--------------|------|---------|-------------------------------------------------------------------------|
|              |      |         | Review uterotonics (Record on page 3)                                   |
|              |      |         | Consider repeat tranexamic acid if bleeding ongoing (1g IV, if no Cl's) |
|              |      |         | Consider advanced surgical techniques (Document on page 4)              |

|                                  |                      |                                |
|----------------------------------|----------------------|--------------------------------|
| <b>Additional Staff Present:</b> | <b>Time arrived:</b> | <b>Time arrived:</b>           |
| Name: _____ Designation: _____   | time: ____:____      | Name: _____ Designation: _____ |
| Name: _____ Designation: _____   | time: ____:____      | Name: _____ Designation: _____ |

**Once bleeding stopped ensure** PPH post-event checklist completed & Management plan written in notes

Completed by: \_\_\_\_\_ (Please print) Date: \_\_\_\_\_ Time: \_\_\_\_:\_\_\_\_ Location \_\_\_\_\_

**Record of Uterotonics used** Please record all uterotonics used here and prescribe on medication or anaesthetic chart

| Drug                              | Dose (please circle route)  | Time | Drug                           | Dose                                    | Time |
|-----------------------------------|-----------------------------|------|--------------------------------|-----------------------------------------|------|
| Oxytocin                          | 10 units IM or 5 units IV   |      | Carboprost (caution in asthma) | 250microg IM (repeat up to every 15min) |      |
| Other                             |                             |      | Carboprost                     | 250microg IM                            |      |
| Ergometrine (caution in HTN/PET)  | 500 microg IV or IM         |      | Carboprost                     | 250microg IM                            |      |
| Syntometrine (caution in HTN/PET) | 500 microg/5 units IM or IV |      | Carboprost                     | 250microg IM                            |      |
| Oxytocin INF                      | 40 units over 4hr IV        |      | Carboprost                     | 250microg IM                            |      |
| Other                             |                             |      | Carboprost                     | 250microg IM                            |      |
| Misoprostol                       |                             |      | Carboprost                     | 250microg IM                            |      |
| Misoprostol                       |                             |      | Other                          |                                         |      |

**Blood & Blood products transfused**

| Time | Product given | Time | Product given |
|------|---------------|------|---------------|
|      |               |      |               |
|      |               |      |               |
|      |               |      |               |
|      |               |      |               |
|      |               |      |               |
|      |               |      |               |
|      |               |      |               |
|      |               |      |               |
|      |               |      |               |
|      |               |      |               |
|      |               |      |               |
|      |               |      |               |
|      |               |      |               |
|      |               |      |               |
|      |               |      |               |
|      |               |      |               |
|      |               |      |               |
|      |               |      |               |
|      |               |      |               |
|      |               |      |               |
|      |               |      |               |

**Measured cumulative blood loss**

| Time | Blood Loss (ml) | Running Total (ml) |
|------|-----------------|--------------------|
|      |                 |                    |
|      |                 |                    |
|      |                 |                    |
|      |                 |                    |
|      |                 |                    |
|      |                 |                    |
|      |                 |                    |
|      |                 |                    |
|      |                 |                    |
|      |                 |                    |
|      |                 |                    |
|      |                 |                    |
|      |                 |                    |
|      |                 |                    |
|      |                 |                    |
|      |                 |                    |
|      |                 |                    |
|      |                 |                    |
|      |                 |                    |
|      |                 |                    |
|      |                 |                    |

**Total Measured Blood Loss = \_\_\_\_\_ ml**

**Record of further blood test results** (Please do not duplicate records of blood results recorded in stage 2)

| Time Taken | Further VBG Test Results |         | Further ROTEM Test Results |                         |
|------------|--------------------------|---------|----------------------------|-------------------------|
|            | Hb                       | Lactate | FBTEM A5 (Aim ≥ 12mm)      | EXTEM CT (Aim < 75 sec) |
|            |                          |         |                            |                         |
|            |                          |         |                            |                         |
|            |                          |         |                            |                         |
|            |                          |         |                            |                         |
|            |                          |         |                            |                         |

Working together to reduce harm from Postpartum Haemorrhage
