# Supplementary material for: Designing and implementing an all Wales postpartum haemorrhage quality improvement project: OBS Cymru (the Obstetric Bleeding Strategy for Wales)
Source: PubMed Central journal article supplement — BMJ Open Qual. 2020 Apr 8;9(2):e000854. doi: 10.1136/bmjoq-2019-000854 (PMC7326295; doi:10.1136/bmjoq-2019-000854), 2020-04-08
Supplement: bmjoq-2019-000854supp004.pdf [file bmjoq-2019-000854supp004.pdf]

Appendix 4. Run chart illustrating weekly percentage of maternities with blood loss measured in 2017 (data extracted from OBS Cymru database, 25/06/2019).

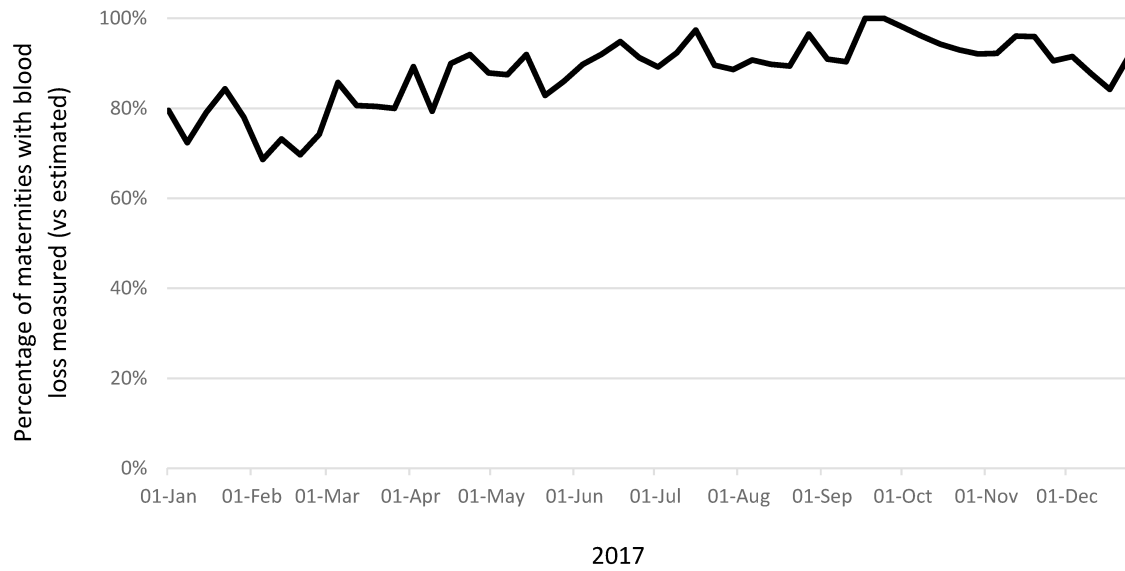

2017
